# Supplementary material for: Neutrophils as Main Players of Immune Response towards Nondegradable Nanoparticles
Source: PubMed Central journal article supplement (PMC7408411; doi:10.3390/nano10071273), 2020-06-29
Supplement: nanomaterials-10-01273-s001.pdf [file nanomaterials-10-01273-s001.pdf]

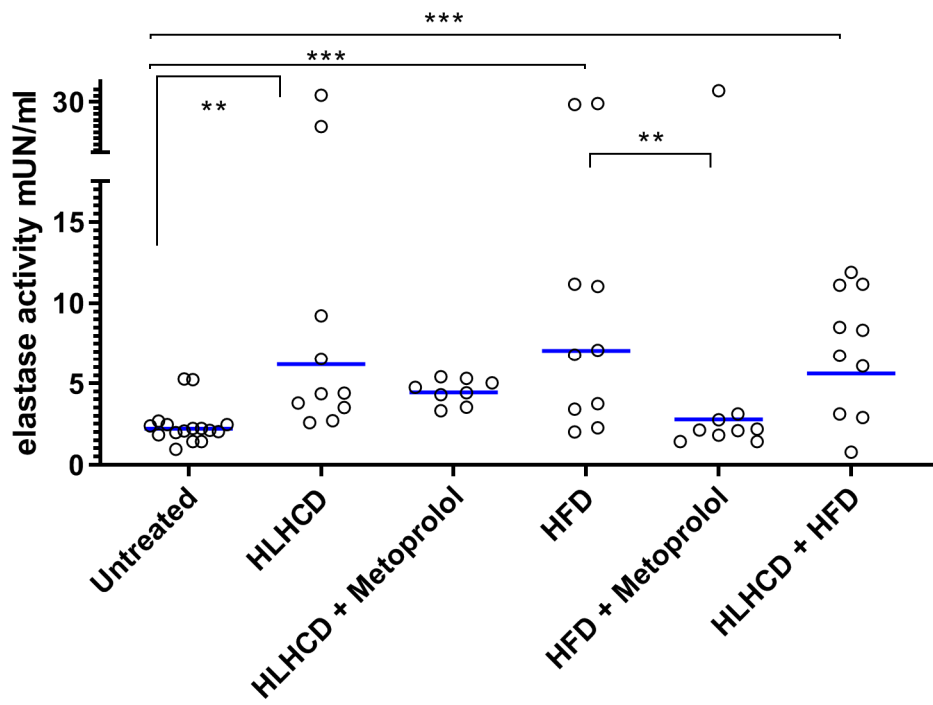

**Figure S1.** Elastase activity in blood serum of mice under high-fat high-cholesterol diet, high-fructose diet, and under the influence of blocker of PMN extravasation.
